# Supplementary material for: Catalytic synthesis of few-layer graphene on titania nanowires
Source: Royal Society of Chemistry journal article supplement (doi:10.1039/c7nr05853e), 2017-12-21
Supplement: c7nr05853e1.pdf [file c7nr05853e1.pdf]

## Supplemental Information

### Catalytic Synthesis of Few-layer Graphene on Titania Nanowires

*Akira Kudo, Sung Mi Jung,\* Michael S. Strano, Jing Kong, and Prof. Brian L Wardle*

Dr. A. Kudo

Department of Materials Science and Engineering, Massachusetts Institute of Technology,  
Cambridge, Massachusetts 02139, USA.

Dr. S. M. Jung and Prof. J. Kong

Department of Electrical Engineering and Computer Science, Massachusetts Institute of  
Technology, Cambridge, Massachusetts 02139, USA.

E-mail: [sungmijung@gmail.com](mailto:sungmijung@gmail.com)

Prof. M. S. Strano

Department of Chemical Engineering, Massachusetts Institute of Technology, Cambridge,  
Massachusetts 02139, USA.

Prof. B. L. Wardle

Department of Aeronautics and Astronautics, Massachusetts Institute of Technology,  
Cambridge, Massachusetts 02139, USA.

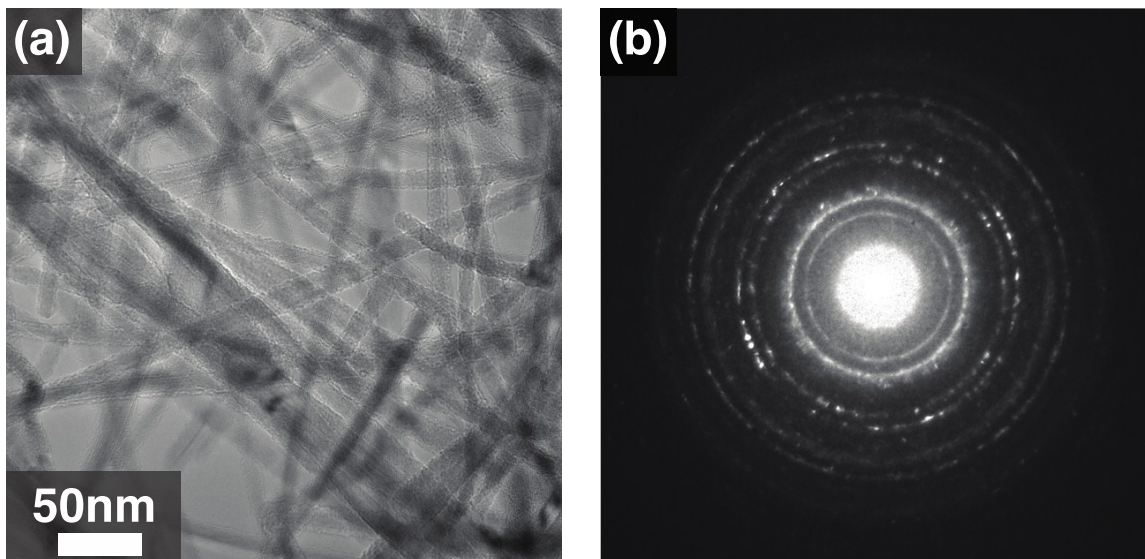

**Figure S1.** A TEM image and the corresponding selected area diffraction pattern from NWAG after 1350 sec CVD. (a) Titania nanowires deposited with graphitic layers. (b) The selected area diffraction pattern from the area that includes (a). Observed diffraction rings are from titania nanowires, a mixture of anatase and rutile phases.<sup>1</sup>

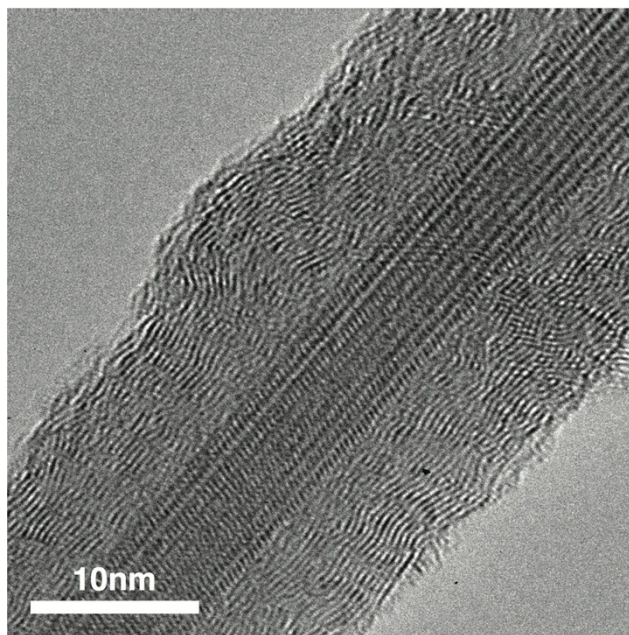

**Figure S2.** A HRTEM image of a titania nanowire deposited with pyrolytic carbon via gas phase pyrolysis during CVD at 850°C. The other CVD parameters are the same as 900 sec CVD at 750°C. The thickness of deposited soot on a titania nanowire is comparable to the diameter of the nanowire itself, yielding a distinctly different morphology as compared to catalytically converted graphitic layers during CVD at 750°C (see Figures 2 and 3).

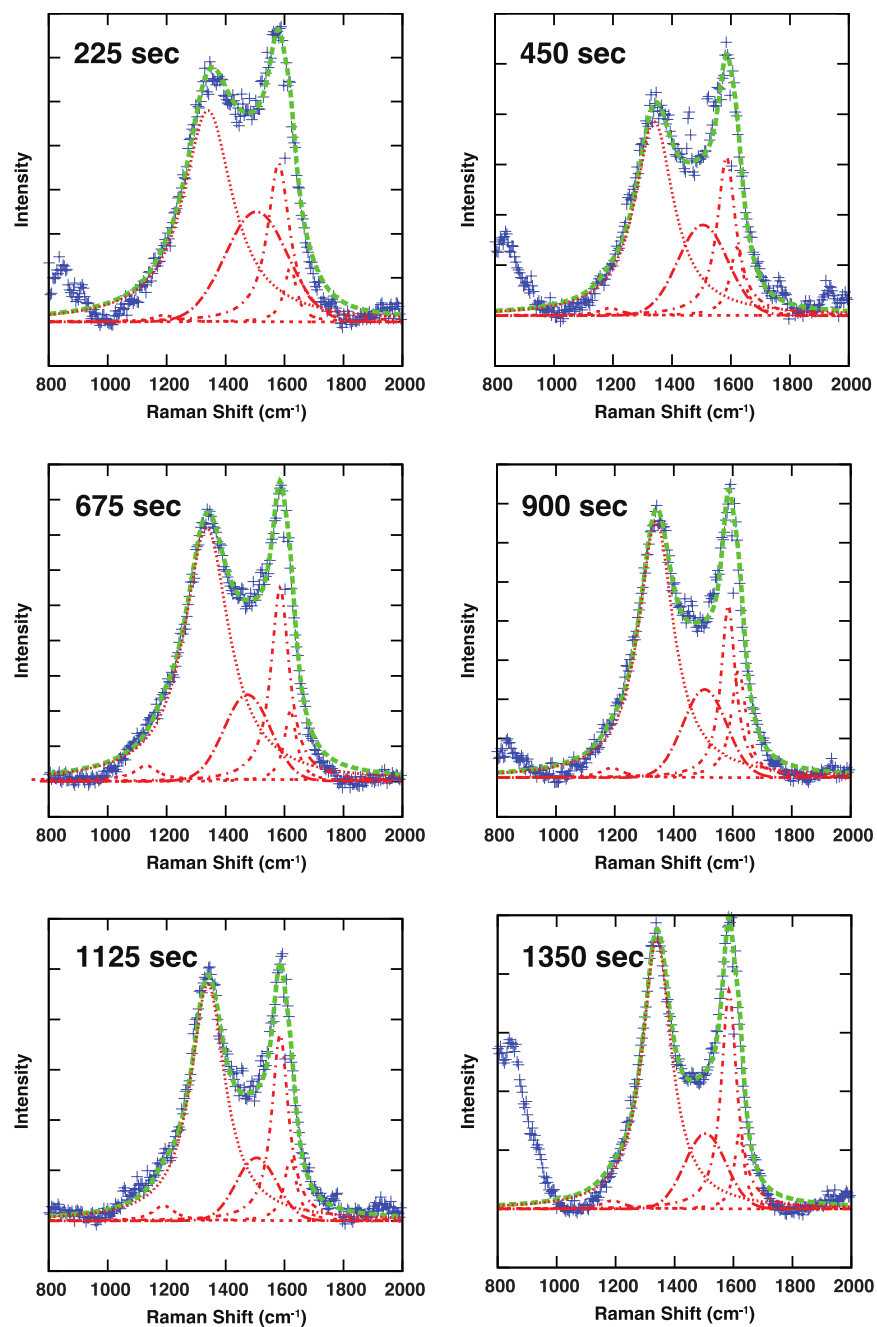

**Figure S3.** Raman spectra taken from the samples after CVD. Raw data of each spectrum is shown in blue and separated into 5 peaks plotted in red. Green dashed lines are the fitting curve (the sum of all the red plots). Fitting for each component is manually implemented, and the goodness of fitting is evaluated by normal probability plots for the difference between the fitting curve and the raw data.

## REFERENCES

- 1 N. Umetsu, S. Sado, K. Ueda, K. Tajima and T. Narushima, *Mater. Trans.*, 2013, **54**, 1302–1307.
